# Supplementary material
Source: HighWire-hosted journal article supplement (https://jnm.snmjournals.org/highwire/filestream/95285/field_highwire_adjunct_files/0/193946_Supplemental_Data.pdf)
Supplement: 193946_Supplemental_Data.pdf [file 193946_Supplemental_Data.pdf]

## Supplemental Figure 1

Kaplan Meier estimates of progression-free (PFS) and overall survival (OS) according to iPET2 combining with PIT score (A, B) and iPET3/4 combining with PIT (C, D).

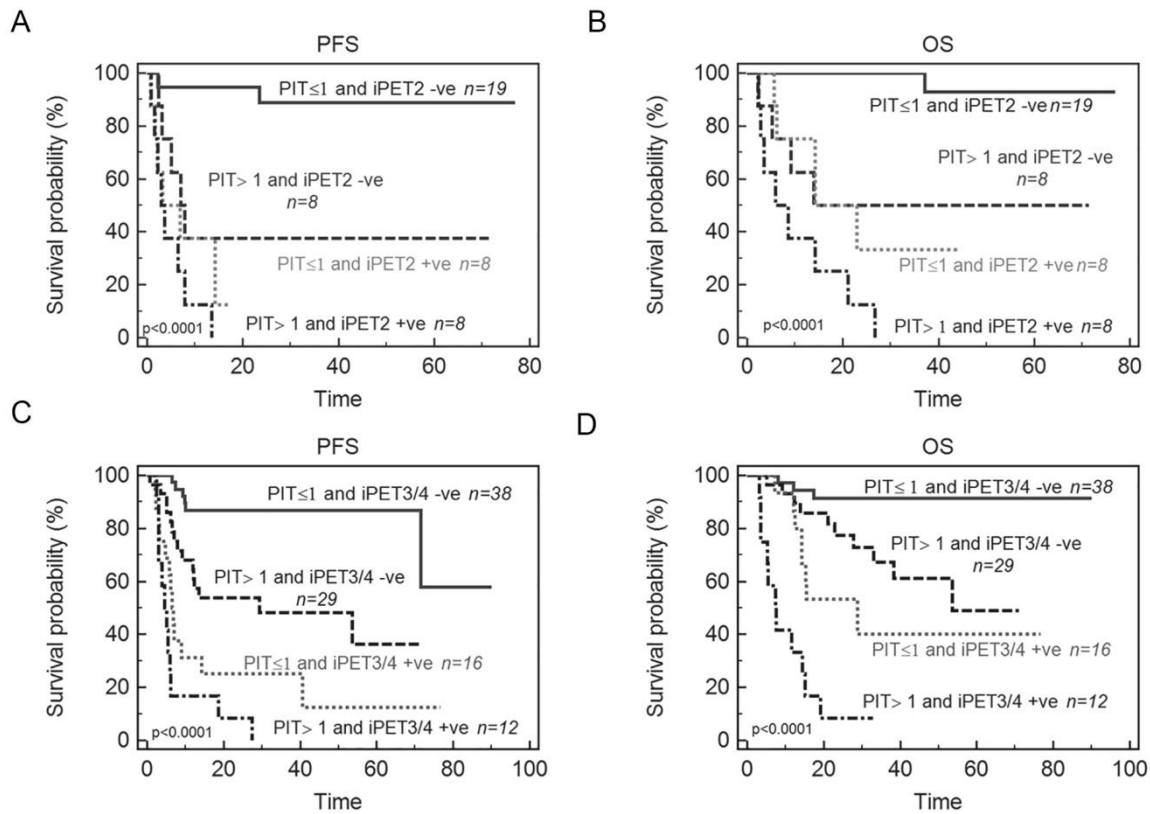

Supplemental Table 1: Multivariate analysis testing PIT vs either iPET2, iPET3/4 or eotPET as cofactor for prediction of PFS and OS respectively.

|                         | PFS  |                  |          | OS   |               |          |
|-------------------------|------|------------------|----------|------|---------------|----------|
|                         | HR   | 95% CI           | <i>P</i> | HR   | 95% CI        | <i>P</i> |
| <b>iPET2 positive</b>   | 6.8  | 2.54 to 18.05    | 0.0001   | 5.8  | 1.94 to 17.31 | 0.0017   |
| PIT>1                   | 3.0  | 1.21 to 7.58     | 0.018    | 4.5  | 1.64 to 12.40 | 0.0038   |
| <b>iPET3/4 positive</b> | 7.0  | 3.78 to 12.88    | <0.0001  | 8.4  | 3.96 to 17.95 | <0.0001  |
| PIT>1                   | 3.1  | 1.69 to 5.78     | 0.0003   | 4.1  | 1.95 to 8.75  | 0.0002   |
| <b>EotPET positive</b>  | 15.6 | 7.20 to 33.96    | <0.0001  | 24.3 | 8.93 to 65.95 | <0.0001  |
| PIT>1                   | 2.0  | 1.0351 to 4.0054 | 0.04     | 1.2  | 0.513 to 2.44 | 0.78     |
